# Supplementary material for: Eating Behavior Associated with Food Intake in European Adolescents Participating in the HELENA Study
Source: MDPI journal article supplement (doi:10.3390/nu14153033), 2022-07-24
Supplement: s1 [file s1]

## SUPPLEMENTARY MATERIAL

File S1: Food groups combined based on their nutritional similarity.

Tables with results of Model 1= adjusted for the variables age, maternal education and BMI Z-score

**Table S1.** Mean (95% CI) intake of food groups by levels of the strength and motivation to eat component (EWI 1), in adolescents from the HELENA study.

| Food Groups                                   | EWI 1 - Strength and motivation to eat |                      |                  |                      |                      |              |
|-----------------------------------------------|----------------------------------------|----------------------|------------------|----------------------|----------------------|--------------|
|                                               | Boys                                   |                      |                  | Girls                |                      |              |
|                                               | Low<br>n = 781                         | High<br>n = 227      | p                | Low<br>n = 900       | High<br>n = 286      | p            |
| Cereals and tubers (g/day)                    | 325.8<br>318.5-333.2                   | 354.4<br>340.7-368.2 | <b>&lt;0.001</b> | 260.4<br>255.0-265.9 | 278.7<br>268.9-288.4 | <b>0.001</b> |
| Sweets (g/day)                                | 77.4<br>74.0-80.9                      | 79.3<br>72.8-85.7    | 0.621            | 66.8<br>64.1-69.6    | 76.0<br>71.1-80.9    | <b>0.002</b> |
| Dairy products (g/day)                        | 324.2<br>307.8-340.5                   | 328.2<br>297.7-358.7 | 0.820            | 251.1<br>240.2-262.0 | 247.7<br>228.3-267.1 | 0.767        |
| Nuts, seeds, olives and avocado (g/day)       | 3.2<br>2.4-3.9                         | 3.4<br>2.0-4.8       | 0.772            | 3.5<br>2.7-4.4       | 5.7<br>4.2-7.2       | <b>0.015</b> |
| Alcoholic beverages (g/day)                   | 24.5<br>15.9-33.2                      | 39.9<br>23.8-55.9    | 0.101            | 5.7<br>2.5-9.0       | 5.3<br>-0.5-11.1     | 0.897        |
| Chocolate (g/day)                             | 26.8<br>24.5-29.2                      | 34.5<br>30.1-38.9    | <b>0.003</b>     | 20.0<br>18.5-21.5    | 25.0<br>22.3-27.7    | <b>0.001</b> |
| Savory snacks (g/day)                         | 9.2<br>7.9-10.4                        | 12.7<br>10.3-15.0    | <b>0.010</b>     | 5.7<br>6.5-9.8       | 8.4<br>7.0-9.8       | <b>0.001</b> |
| Vegetable oils (g/day)                        | 7.5<br>6.7-8.3                         | 7.8<br>6.3-9.2       | 0.770            | 6.1<br>5.5-6.7       | 6.1<br>5.0-7.1       | 0.940        |
| Margarine and lipids of mixed origins (g/day) | 4.1<br>3.4-4.8                         | 4.1<br>2.8-5.4       | 0.971            | 2.8<br>2.4-3.2       | 2.2<br>1.4-2.9       | 0.141        |
| Butter and animal fats (g/day)                | 6.7<br>5.7-7.6                         | 7.5<br>5.8-9.2       | 0.380            | 4.9<br>4.3-5.5       | 6.0<br>4.9-7.1       | 0.088        |
| Sauces (g/day)                                | 35.9<br>34.0-37.8                      | 39.8<br>36.2-43.4    | 0.061            | 28.9<br>27.4-30.3    | 34.1<br>31.6-36.7    | <b>0.001</b> |

|                                     |                      |                      |              |                      |                      |              |
|-------------------------------------|----------------------|----------------------|--------------|----------------------|----------------------|--------------|
| Pulses (g/day)                      | 9.8<br>7.5-12.1      | 12.6<br>8.4-16.9     | 0.250        | 7.9<br>6.2-9.6       | 11.2<br>8.1-14.2     | 0.069        |
| Vegetables (excl. potatoes) (g/day) | 89.3<br>85.1-93.5    | 95.0<br>87.2-102.8   | 0.204        | 91.3<br>87.7-95.0    | 95.7<br>89.2-102.2   | 0.251        |
| Fruits (g/day)                      | 124.5<br>117.1-131.8 | 129.6<br>115.9-143.3 | 0.518        | 129.4<br>123.4-135.4 | 131.1<br>120.4-141.8 | 0.788        |
| Soups, bouillon (g/day)             | 39.9<br>35.0-44.9    | 37.2<br>28.0-46.4    | 0.606        | 37.5<br>33.5-41.5    | 45.4<br>38.3-52.5    | 0.057        |
| Water (g/day)                       | 742.0<br>704.1-779.9 | 762.7<br>692.1-833.3 | 0.613        | 736.3<br>704.2-768.3 | 764.7<br>707.5-821.9 | 0.396        |
| Coffee, tea (g/day)                 | 43.3<br>36.1-50.6    | 46.0<br>32.5-59.5    | 0.734        | 50.8<br>43.8-57.8    | 51.7<br>39.2-64.2    | 0.904        |
| Fruit and vegetables juices (g/day) | 169.9<br>158.2-181.6 | 157.5<br>135.7-179.3 | 0.326        | 140.4<br>131.7-149.0 | 134.7<br>119.3-150.1 | 0.530        |
| Sugar sweetened beverages (g/day)   | 358.8<br>334.2-383.4 | 427.2<br>381.4-473.0 | <b>0.010</b> | 211.8<br>197.4-226.3 | 217.2<br>191.5-243.0 | 0.721        |
| Meat and meat products (g/day)      | 163.7<br>157.9-169.5 | 162.0<br>151.2-172.8 | 0.789        | 127.3<br>123.1-131.6 | 139.0<br>131.5-146.5 | <b>0.008</b> |
| Fish and fish products (g/day)      | 20.4<br>18.8-22.0    | 20.3<br>17.3-23.3    | 0.950        | 19.9<br>18.5-21.4    | 19.7<br>17.1-22.3    | 0.875        |
| Eggs (g/day)                        | 13.5<br>12.4-14.7    | 12.4<br>10.3-14.5    | 0.340        | 11.2<br>10.3-12.1    | 10.7<br>9.1-12.3     | 0.613        |

CI= Confidence Intervals; EWI= The Eating Attitudes and Weight problems Inventory; HELENA = Healthy Lifestyle in Europe by Nutrition in Adolescence; g= grams; Significant difference in the ANCOVA ( $p < 0.05$ ).

**Table S2.** Mean (95% CI) intake of food groups by levels of the importance and impact of eating component (EWI 2), in adolescents from the HELENA study.

| Food Groups                | EWI 2 - Importance and impact of eating |                      |              |                      |                      |              |
|----------------------------|-----------------------------------------|----------------------|--------------|----------------------|----------------------|--------------|
|                            | Boys                                    |                      |              | Girls                |                      |              |
|                            | Low                                     | High                 | p            | Low                  | High                 | p            |
|                            | n= 770                                  | n= 238               |              | n= 904               | n= 282               |              |
| Cereals and tubers (g/day) | 332.2<br>324.8-339.7                    | 332.5<br>319.9-345.9 | 0.977        | 262.6<br>257.1-268.1 | 272.1<br>262.3-281.9 | 0.098        |
|                            | 75.7                                    | 84.9                 | <b>0.012</b> | 67.2                 | 75.0                 | <b>0.007</b> |

|                                               |             |             |              |             |             |              |
|-----------------------------------------------|-------------|-------------|--------------|-------------|-------------|--------------|
| Sweets (g/day)                                | 72.2-79.1   | 78.6-91.1   |              | 64.4-70.0   | 70.0-80.0   |              |
|                                               | 320.6       | 339.5       |              | 249.7       | 252.1       |              |
| Dairy products (g/day)                        | 304.1-337.1 | 309.9-369.1 | 0.274        | 238.8-260.6 | 232.5-271.6 | 0.836        |
|                                               | 2.8         | 4.4         |              | 3.7         | 5.2         |              |
| Nuts, seeds, olives and avocado (g/day)       | 2.1-3.6     | 3.0-5.8     | 0.052        | 2.9-4.6     | 3.6-6.7     | 0.105        |
|                                               | 30.4        | 20.3        |              | 6.5         | 2.8         |              |
| Alcoholic beverages (g/day)                   | 21.7-39.0   | 4.7-35.9    | 0.270        | 3.2-9.8     | -2.9-8.87   | 0.284        |
|                                               | 28.3        | 29.4        |              | 20.6        | 23.1        |              |
| Chocolate (g/day)                             | 25.9-30.7   | 25.1-33.8   | 0.644        | 19.1-22.1   | 20.4-25.8   | 0.112        |
|                                               | 9.2         | 12.7        |              | 5.8         | 8.0         |              |
| Savory snacks (g/day)                         | 7.9-10.3    | 10.3-15.0   | <b>0.010</b> | 5.0-6.6     | 6.6-9.4     | <b>0.008</b> |
|                                               | 7.2         | 8.9         |              | 5.7         | 7.6         |              |
| Vegetable oils (g/day)                        | 6.4-8.0     | 7.4-10.3    | <b>0.044</b> | 5.1-6.2     | 6.5-8.6     | <b>0.002</b> |
|                                               | 4.4         | 3.1         |              | 2.9         | 1.8         |              |
| Margarine and lipids of mixed origins (g/day) | 3.7-5.1     | 1.8-4.4     | 0.070        | 2.5-3.3     | 1.0-2.5     | <b>0.009</b> |
|                                               | 7.3         | 5.5         |              | 5.2         | 5.2         |              |
| Butter and animal fats (g/day)                | 6.3-8.2     | 3.9-7.2     | 0.072        | 4.6-5.8     | 4.1-6.3     | 0.931        |
|                                               | 36.0        | 39.3        |              | 30.0        | 30.8        |              |
| Sauces (g/day)                                | 34.1-38.0   | 35.7-42.8   | 0.113        | 28.5-31.4   | 28.1-33.4   | 0.608        |
|                                               | 9.6         | 12.9        |              | 8.3         | 10.0        |              |
| Pulses (g/day)                                | 7.3-11.9    | 8.8-17.0    | 0.178        | 6.6-10.0    | 7.0-13.1    | 0.330        |
|                                               | 88.0        | 99.1        |              | 90.4        | 98.8        |              |
| Vegetables (excl. potatoes) (g/day)           | 83.8-92.1   | 91.5-106.7  | <b>0.012</b> | 86.8-94.0   | 92.2-105.3  | <b>0.028</b> |
|                                               | 121.5       | 139.9       |              | 130.8       | 126.7       |              |
| Fruits (g/day)                                | 113.9-128.6 | 126.7-153.1 | <b>0.016</b> | 124.8-136.7 | 115.9-137.4 | 0.516        |
|                                               | 38.4        | 42.4        |              | 39.0        | 40.9        |              |
| Soups, bouillon (g/day)                       | 33.4-43.3   | 33.5-51.3   | 0.440        | 35.0-42.9   | 33.7-48.0   | 0.645        |
|                                               | 716.6       | 843.8       |              | 743.9       | 740.5       |              |
| Water (g/day)                                 | 678.8-754.6 | 775.5-912.0 | <b>0.001</b> | 711.9-775.9 | 683.0-798.0 | 0.919        |
|                                               | 45.2        | 39.9        |              | 52.5        | 46.2        |              |
| Cofee, tea (g/day)                            | 37.9-52.4   | 26.8-53.0   | 0.489        | 45.5-59.5   | 33.6-58.8   | 0.392        |
|                                               | 173.3       | 147.0       |              | 140.9       | 133.0       |              |
| Fruit and vegetables juices (g/day)           | 161.6-185.1 | 125.9-168.2 | <b>0.033</b> | 132.3-149.5 | 117.5-148.4 | 0.382        |
|                                               | 376.9       | 365.4       |              | 220.0       | 191.1       |              |
| Sugar sweetened bevarages (g/day)             |             |             | 0.659        |             |             | 0.055        |

|                                |                      |                      |        |                      |                      |       |
|--------------------------------|----------------------|----------------------|--------|----------------------|----------------------|-------|
|                                | 352.1-401.7          | 320.8-410.1          |        | 205.6-234.4          | 165.2-216.9          |       |
| Meat and meat products (g/day) | 161.0<br>155.2-166.9 | 170.6<br>160.1-181.1 | 0.120  | 129.9<br>125.7-134.1 | 130.9<br>123.4-138.5 | 0.818 |
| Fish and fish products (g/day) | 18.8<br>17.2-20.4    | 25.5<br>22.7-28.4    | <0.001 | 19.9<br>18.5-21.4    | 19.7<br>17.1-22.3    | 0.899 |
| Eggs (g/day)                   | 12.6<br>11.5-13.7    | 15.5<br>13.4-17.5    | 0.017  | 10.5<br>9.6-11.4     | 12.8<br>11.2-14.4    | 0.015 |

CI= Confidence Intervals; EWI= The Eating Attitudes and Weight problems Inventory; HELENA = Healthy Lifestyle in Europe by Nutrition in Adolescence; g= grams; Significant difference in the ANCOVA ( $p < 0.05$ ).

**Table S3.** Mean (95% CI) intake of food groups by levels of the eating as a means of coping with emotional stress component (EWI 3) in adolescents from the HELENA study.

| Food Groups                                   | EWI 3 - Eating as a means of coping with emotional stress |                      |       |                      |                      |        |
|-----------------------------------------------|-----------------------------------------------------------|----------------------|-------|----------------------|----------------------|--------|
|                                               | Boys                                                      |                      |       | Girls                |                      |        |
|                                               | Low<br>n=833                                              | High<br>n= 175       | p     | Low<br>n= 886        | High<br>n= 194       | p      |
| Cereals and tubers (g/day)                    | 328.9<br>321.7-336.1                                      | 348.4<br>332.6-364.2 | 0.028 | 258.7<br>253.2-264.2 | 284.1<br>272.2-295.9 | <0.001 |
| Sweets (g/day)                                | 77.6<br>74.2-80.9                                         | 79.1<br>71.8-86.5    | 0.713 | 67.6<br>64.8-70.4    | 74.3<br>68.2-80.3    | 0.051  |
| Dairy products (g/day)                        | 320.6<br>304.1-337.1                                      | 339.5<br>309.9-369.1 | 0.274 | 247.6<br>236.6-258.7 | 255.3<br>231.5-279.1 | 0.568  |
| Nuts, seeds, olives and avocado (g/day)       | 3.1<br>2.3-3.8                                            | 4.0<br>2.4-5.6       | 0.309 | 3.5<br>2.7-4.3       | 5.8<br>4.0-7.6       | 0.021  |
| Alcoholic beverages (g/day)                   | 26.2<br>17.8-34.5                                         | 36.7<br>18.3-55.1    | 0.308 | 5.3<br>1.9-8.8       | 9.6<br>2.1-17.0      | 0.313  |
| Chocolate (g/day)                             | 28.3<br>25.9-30.7                                         | 29.4<br>25.1-33.8    | 0.644 | 21.3<br>19.7-22.8    | 21.5<br>18.1-24.8    | 0.929  |
| Savory snacks (g/day)                         | 10.1<br>8.8-11.3                                          | 9.5<br>6.8-12.2      | 0.699 | 5.8<br>5.0-6.6       | 8.3<br>6.6-10.0      | 0.010  |
| Vegetable oils (g/day)                        | 7.4<br>6.7-8.2                                            | 8.3<br>6.6-10.0      | 0.372 | 5.8<br>5.2-6.4       | 7.4<br>6.1-8.7       | 0.026  |
| Margarine and lipids of mixed origins (g/day) | 4.1<br>3.4-4.8                                            | 4.1<br>2.6-5.5       | 0.932 | 2.9<br>2.4-3.3       | 2.2<br>1.3-3.2       | 0.223  |

|                                     |                      |                      |              |                      |                      |                  |
|-------------------------------------|----------------------|----------------------|--------------|----------------------|----------------------|------------------|
| Butter and animal fats (g/day)      | 6.7<br>5.8-7.6       | 7.5<br>5.5-9.4       | 0.495        | 4.9<br>4.3-5.6       | 6.2<br>4.9-7.5       | 0.099            |
| Sauces (g/day)                      | 36.1<br>34.2-38.0    | 40.0<br>35.9-44.1    | 0.091        | 29.1<br>27.7-30.6    | 31.4<br>28.3-34.5    | 0.203            |
| Pulses (g/day)                      | 9.3<br>7.1-11.5      | 15.6<br>10.7-20.4    | <b>0.022</b> | 8.1<br>6.4-9.7       | 10.1<br>6.5-13.6     | 0.323            |
| Vegetables (excl. potatoes) (g/day) | 89.4<br>85.4-93.5    | 96.2<br>87.3-105.1   | 0.175        | 89.8<br>86.0-93.5    | 107.4<br>99.3-115.4  | <b>&lt;0.001</b> |
| Fruits (g/day)                      | 122.6<br>115.5-129.7 | 139.9<br>124.3-155.5 | <b>0.049</b> | 131.4<br>125.4-137.5 | 122.9<br>109.9-135.9 | 0.243            |
| Soups, bouillon (g/day)             | 38.8<br>34.0-43.6    | 41.8<br>31.3-52.3    | 0.608        | 39.2<br>35.1-43.3    | 46.9<br>38.1-55.7    | 0.121            |
| Water (g/day)                       | 751.0<br>714.3-787.7 | 725.9<br>645.3-806.6 | 0.580        | 728.8<br>696.2-761.5 | 808.5<br>738.1-878.9 | <b>0.045</b>     |
| Coffee, tea (g/day)                 | 43.7<br>36.7-50.7    | 45.1<br>29.7-60.5    | 0.865        | 49.4<br>42.4-56.4    | 54.9<br>39.9-70.0    | 0.514            |
| Fruit and vegetables juices (g/day) | 169.5<br>158.1-180.8 | 156.1<br>131.2-181.0 | 0.340        | 139.1<br>130.2-148.0 | 141.9<br>122.8-161.1 | 0.793            |
| Sugar sweetened beverages (g/day)   | 366.9<br>343.0-390.7 | 409.1<br>356.7-461.5 | 0.151        | 218.5<br>204.0-233.0 | 199.4<br>168.1-230.6 | 0.277            |
| Meat and meat products (g/day)      | 161.4<br>155.8-167.1 | 172.2<br>159.8-184.5 | 0.123        | 126.7<br>122.5-130.9 | 141.0<br>132.0-150.0 | 0.005            |
| Fish and fish products (g/day)      | 20.2<br>18.6-21.7    | 21.5<br>18.1-24.8    | 0.499        | 19.8<br>18.3-21.3    | 19.1<br>15.9-22.3    | 0.700            |
| Eggs (g/day)                        | 13.1<br>12.0-14.2    | 14.1<br>11.7-16.5    | 0.447        | 10.6<br>9.7-11.5     | 12.1<br>10.2-14.0    | 0.169            |

CI= Confidence Intervals; EWI= The Eating Attitudes and Weight problems Inventory; HELENA = Healthy Lifestyle in Europe by Nutrition in Adolescence; g= grams; Significant difference in the ANCOVA ( $p < 0.05$ )
